# Supplementary material
Source: publisher figshare collection journal article supplement (https://acs.figshare.com/ndownloader/files/4578946)
Supplement: Supplementary file 1 [file 4578946]

  
data_70620csp2_0m 
_publ_requested_journal         ?
_publ_contact_author_name        'Shuoping Chen'
_publ_contact_author_address     
;College of Chemistry and Molecular Sciences
Wuhan University
Wuhan 430072
P. R. China

;
_publ_contact_author_email       chenshuoping_777@163.com
_publ_contact_author_phone       86-27-87218264
_publ_contact_author_fax         86-27-68754067
loop_
_publ_author_name
_publ_author_address
'Chen, Shuoping'
;College of Chemistry and Molecular Sciences
Wuhan University
Wuhan 430072
P. R. China

;

  
_audit_creation_method            SHELXL-97 
_chemical_name_systematic 
; 
 ? 
; 
_chemical_name_common             ? 
_chemical_melting_point           ? 
_chemical_formula_moiety          ? 
_chemical_formula_sum 
 'C4 H14 N4 O7 P2' 
_chemical_formula_weight          292.13 
  
loop_ 
 _atom_type_symbol 
 _atom_type_description 
 _atom_type_scat_dispersion_real 
 _atom_type_scat_dispersion_imag 
 _atom_type_scat_source 
 'C'  'C'   0.0033   0.0016 
 'International Tables Vol C Tables 4.2.6.8 and 6.1.1.4' 
 'H'  'H'   0.0000   0.0000 
 'International Tables Vol C Tables 4.2.6.8 and 6.1.1.4' 
 'N'  'N'   0.0061   0.0033 
 'International Tables Vol C Tables 4.2.6.8 and 6.1.1.4' 
 'O'  'O'   0.0106   0.0060 
 'International Tables Vol C Tables 4.2.6.8 and 6.1.1.4' 
 'P'  'P'   0.1023   0.0942 
 'International Tables Vol C Tables 4.2.6.8 and 6.1.1.4' 
  
_symmetry_cell_setting            Triclinic 
_symmetry_space_group_name_H-M    P-1 
  
loop_ 
 _symmetry_equiv_pos_as_xyz 
 'x, y, z' 
 '-x, -y, -z' 
  
_cell_length_a                    5.5117(4) 
_cell_length_b                    9.3252(7) 
_cell_length_c                    11.7405(9) 
_cell_angle_alpha                 77.7620(10) 
_cell_angle_beta                  79.4210(10) 
_cell_angle_gamma                 76.2830(10) 
_cell_volume                      567.23(7) 
_cell_formula_units_Z             2 
_cell_measurement_temperature     273(2) 
_cell_measurement_reflns_used     2626 
_cell_measurement_theta_min       2.28 
_cell_measurement_theta_max       29.84 
  
_exptl_crystal_description       block
_exptl_crystal_colour            colorless
_exptl_crystal_size_max           0.29 
_exptl_crystal_size_mid           0.24 
_exptl_crystal_size_min           0.19 
_exptl_crystal_density_meas       ?
_exptl_crystal_density_diffrn     1.710 
_exptl_crystal_density_method     'not measured' 
_exptl_crystal_F_000              304 
_exptl_absorpt_coefficient_mu     0.416 
_exptl_absorpt_correction_type    Multi-scan
_exptl_absorpt_correction_T_min   0.8888 
_exptl_absorpt_correction_T_max   0.9251 
_exptl_absorpt_process_details    SADABS
  
_exptl_special_details 
; 
 ? 
; 
  
_diffrn_ambient_temperature       273(2) 
_diffrn_radiation_wavelength      0.71073 
_diffrn_radiation_type            MoK\a 
_diffrn_radiation_source          'fine-focus sealed tube' 
_diffrn_radiation_monochromator   graphite 
_diffrn_measurement_device_type   'CCD area detector' 
_diffrn_measurement_method        'phi and omega scans' 
_diffrn_detector_area_resol_mean  ? 
_diffrn_standards_number          ? 
_diffrn_standards_interval_count  ? 
_diffrn_standards_interval_time   ? 
_diffrn_standards_decay_%         ? 
_diffrn_reflns_number             3810 
_diffrn_reflns_av_R_equivalents   0.0116 
_diffrn_reflns_av_sigmaI/netI     0.0194 
_diffrn_reflns_limit_h_min        -7 
_diffrn_reflns_limit_h_max        5 
_diffrn_reflns_limit_k_min        -12 
_diffrn_reflns_limit_k_max        12 
_diffrn_reflns_limit_l_min        -15 
_diffrn_reflns_limit_l_max        13 
_diffrn_reflns_theta_min          2.28 
_diffrn_reflns_theta_max          27.99 
_reflns_number_total              2638 
_reflns_number_gt                 2460 
_reflns_threshold_expression      >2sigma(I) 
  
_computing_data_collection        'Bruker SMART' 
_computing_cell_refinement        'Bruker SMART' 
_computing_data_reduction         'Bruker SAINT' 
_computing_structure_solution     'SHELXS-97 (Sheldrick, 1990)' 
_computing_structure_refinement   'SHELXL-97 (Sheldrick, 1997)' 
_computing_molecular_graphics     'Bruker SHELXTL' 
_computing_publication_material   'Bruker SHELXTL' 
  
_refine_special_details 
; 
 Refinement of F^2^ against ALL reflections.  The weighted R-factor wR and 
 goodness of fit S are based on F^2^, conventional R-factors R are based 
 on F, with F set to zero for negative F^2^. The threshold expression of 
 F^2^ > 2sigma(F^2^) is used only for calculating R-factors(gt) etc. and is 
 not relevant to the choice of reflections for refinement.  R-factors based 
 on F^2^ are statistically about twice as large as those based on F, and R- 
 factors based on ALL data will be even larger. 
; 
  
_refine_ls_structure_factor_coef  Fsqd 
_refine_ls_matrix_type            full 
_refine_ls_weighting_scheme       calc 
_refine_ls_weighting_details 
 'calc w=1/[\s^2^(Fo^2^)+(0.0483P)^2^+0.2825P] where P=(Fo^2^+2Fc^2^)/3' 
_atom_sites_solution_primary      direct 
_atom_sites_solution_secondary    difmap 
_atom_sites_solution_hydrogens    geom 
_refine_ls_hydrogen_treatment     mixed 
_refine_ls_extinction_method      SHELXL 
_refine_ls_extinction_coef        0.027(4) 
_refine_ls_extinction_expression 
 'Fc^*^=kFc[1+0.001xFc^2^\l^3^/sin(2\q)]^-1/4^' 
_refine_ls_number_reflns          2638 
_refine_ls_number_parameters      181 
_refine_ls_number_restraints      0 
_refine_ls_R_factor_all           0.0308 
_refine_ls_R_factor_gt            0.0288 
_refine_ls_wR_factor_ref          0.0855 
_refine_ls_wR_factor_gt           0.0839 
_refine_ls_goodness_of_fit_ref    1.066 
_refine_ls_restrained_S_all       1.066 
_refine_ls_shift/su_max           0.010 
_refine_ls_shift/su_mean          0.001 
  
loop_ 
 _atom_site_label 
 _atom_site_type_symbol 
 _atom_site_fract_x 
 _atom_site_fract_y 
 _atom_site_fract_z 
 _atom_site_U_iso_or_equiv 
 _atom_site_adp_type 
 _atom_site_occupancy 
 _atom_site_symmetry_multiplicity 
 _atom_site_calc_flag 
 _atom_site_refinement_flags 
 _atom_site_disorder_assembly 
 _atom_site_disorder_group 
C2 C 0.3699(4) 0.3087(2) 0.45554(16) 0.0326(4) Uani 1 1 d . . . 
H2 H 0.3156 0.3770 0.5069 0.039 Uiso 1 1 calc R . . 
C5 C 0.5695(4) 0.1924(2) 0.31792(19) 0.0464(5) Uani 1 1 d . . . 
H5 H 0.6869 0.1670 0.2538 0.056 Uiso 1 1 calc R . . 
C6 C 0.8422(2) 0.71239(15) 0.13624(12) 0.0160(3) Uani 1 1 d . . . 
C7 C 0.7099(3) 0.84686(17) 0.19645(14) 0.0233(3) Uani 1 1 d . . . 
H7A H 0.5899 0.9128 0.1491 0.035 Uiso 1 1 calc R . . 
H7B H 0.8329 0.8999 0.2053 0.035 Uiso 1 1 calc R . . 
H7C H 0.6242 0.8120 0.2725 0.035 Uiso 1 1 calc R . . 
H1 H 0.672(5) 0.378(3) 0.353(2) 0.055(7) Uiso 1 1 d . . . 
H3 H 0.150(6) 0.173(3) 0.499(2) 0.056(8) Uiso 1 1 d . . . 
H6 H 0.811(5) 0.981(3) -0.051(2) 0.051(7) Uiso 1 1 d . . . 
H7 H 1.124(5) 0.416(3) 0.144(2) 0.036(6) Uiso 1 1 d . . . 
H1W1 H 0.780(6) 0.064(4) 0.627(3) 0.067(9) Uiso 1 1 d . . . 
H2W1 H 0.826(5) 0.193(3) 0.643(2) 0.052(7) Uiso 1 1 d . . . 
N1 N 0.5630(3) 0.30825(17) 0.37025(14) 0.0319(3) Uani 1 1 d . . . 
N3 N 0.2691(3) 0.19570(17) 0.45465(14) 0.0335(3) Uani 1 1 d . . . 
N4 N 0.3919(4) 0.11975(19) 0.36760(16) 0.0455(4) Uani 1 1 d . . . 
N6 N 0.6417(2) 0.64133(13) 0.11280(11) 0.0185(2) Uani 1 1 d . . . 
H6A H 0.5379 0.6219 0.1791 0.028 Uiso 1 1 calc R . . 
H6B H 0.7140 0.5563 0.0865 0.028 Uiso 1 1 calc R . . 
H6C H 0.5547 0.7039 0.0589 0.028 Uiso 1 1 calc R . . 
O1 O 1.23504(19) 0.83534(11) 0.01544(10) 0.0215(2) Uani 1 1 d . . . 
O2 O 1.0907(2) 0.65093(12) -0.07650(10) 0.0238(2) Uani 1 1 d . . . 
O3 O 0.8249(2) 0.90311(13) -0.07114(10) 0.0241(2) Uani 1 1 d . . . 
O4 O 1.2053(2) 0.64790(12) 0.28106(10) 0.0239(2) Uani 1 1 d . . . 
O5 O 1.2028(2) 0.45375(13) 0.16916(11) 0.0263(3) Uani 1 1 d . . . 
O6 O 0.8408(2) 0.50883(13) 0.33339(10) 0.0265(3) Uani 1 1 d . . . 
O1W O 0.8755(3) 0.1245(2) 0.60387(17) 0.0621(6) Uani 1 1 d . . . 
P1 P 1.02163(6) 0.77563(4) -0.00702(3) 0.01582(12) Uani 1 1 d . . . 
P2 P 1.03187(6) 0.57390(4) 0.24103(3) 0.01668(12) Uani 1 1 d . . . 
  
loop_ 
 _atom_site_aniso_label 
 _atom_site_aniso_U_11 
 _atom_site_aniso_U_22 
 _atom_site_aniso_U_33 
 _atom_site_aniso_U_23 
 _atom_site_aniso_U_13 
 _atom_site_aniso_U_12 
C2 0.0375(9) 0.0297(8) 0.0327(9) -0.0078(7) -0.0017(7) -0.0115(7) 
C5 0.0551(13) 0.0364(10) 0.0456(11) -0.0140(9) 0.0207(10) -0.0209(9) 
C6 0.0121(6) 0.0155(6) 0.0215(6) -0.0056(5) -0.0007(5) -0.0043(5) 
C7 0.0214(7) 0.0195(7) 0.0284(7) -0.0096(6) 0.0003(6) -0.0013(5) 
N1 0.0338(8) 0.0273(7) 0.0345(8) -0.0004(6) -0.0016(6) -0.0132(6) 
N3 0.0349(8) 0.0328(8) 0.0342(8) -0.0080(6) 0.0057(6) -0.0156(7) 
N4 0.0597(11) 0.0356(8) 0.0450(9) -0.0181(7) 0.0158(8) -0.0252(8) 
N6 0.0126(5) 0.0193(5) 0.0244(6) -0.0042(5) -0.0024(4) -0.0047(4) 
O1 0.0160(5) 0.0179(5) 0.0317(6) -0.0033(4) -0.0039(4) -0.0059(4) 
O2 0.0264(6) 0.0201(5) 0.0257(5) -0.0097(4) 0.0004(4) -0.0046(4) 
O3 0.0248(6) 0.0177(5) 0.0309(6) -0.0028(4) -0.0108(4) -0.0028(4) 
O4 0.0208(5) 0.0265(5) 0.0288(6) -0.0085(4) -0.0065(4) -0.0078(4) 
O5 0.0233(6) 0.0235(5) 0.0334(6) -0.0125(5) -0.0068(5) 0.0015(4) 
O6 0.0254(6) 0.0293(6) 0.0254(6) -0.0009(4) -0.0003(4) -0.0129(5) 
O1W 0.0609(11) 0.0707(11) 0.0705(11) -0.0501(10) 0.0358(9) -0.0454(10) 
P1 0.01469(19) 0.01344(18) 0.01986(19) -0.00383(13) -0.00149(13) -0.00386(13) 
P2 0.01442(19) 0.01687(18) 0.0199(2) -0.00443(13) -0.00236(13) -0.00446(13) 
  
_geom_special_details 
; 
 All esds (except the esd in the dihedral angle between two l.s. planes) 
 are estimated using the full covariance matrix.  The cell esds are taken 
 into account individually in the estimation of esds in distances, angles 
 and torsion angles; correlations between esds in cell parameters are only 
 used when they are defined by crystal symmetry.  An approximate (isotropic) 
 treatment of cell esds is used for estimating esds involving l.s. planes. 
; 
  
loop_ 
 _geom_bond_atom_site_label_1 
 _geom_bond_atom_site_label_2 
 _geom_bond_distance 
 _geom_bond_site_symmetry_2 
 _geom_bond_publ_flag 
C2 N3 1.305(2) . ? 
C2 N1 1.321(2) . ? 
C2 H2 0.9300 . ? 
C5 N4 1.302(3) . ? 
C5 N1 1.342(2) . ? 
C5 H5 0.9300 . ? 
C6 N6 1.5077(17) . ? 
C6 C7 1.5351(18) . ? 
C6 P1 1.8439(14) . ? 
C6 P2 1.8527(14) . ? 
C7 H7A 0.9600 . ? 
C7 H7B 0.9600 . ? 
C7 H7C 0.9600 . ? 
N1 H1 0.95(3) . ? 
N3 N4 1.353(2) . ? 
N3 H3 0.80(3) . ? 
N6 H6A 0.8900 . ? 
N6 H6B 0.8900 . ? 
N6 H6C 0.8900 . ? 
O1 P1 1.5000(10) . ? 
O2 P1 1.4969(11) . ? 
O3 P1 1.5701(11) . ? 
O3 H6 0.79(3) . ? 
O4 P2 1.4921(11) . ? 
O5 P2 1.5696(11) . ? 
O5 H7 0.75(2) . ? 
O6 P2 1.5025(11) . ? 
O1W H1W1 0.83(3) . ? 
O1W H2W1 0.83(3) . ? 
  
loop_ 
 _geom_angle_atom_site_label_1 
 _geom_angle_atom_site_label_2 
 _geom_angle_atom_site_label_3 
 _geom_angle 
 _geom_angle_site_symmetry_1 
 _geom_angle_site_symmetry_3 
 _geom_angle_publ_flag 
N3 C2 N1 107.51(16) . . ? 
N3 C2 H2 126.2 . . ? 
N1 C2 H2 126.2 . . ? 
N4 C5 N1 111.92(17) . . ? 
N4 C5 H5 124.0 . . ? 
N1 C5 H5 124.0 . . ? 
N6 C6 C7 107.93(11) . . ? 
N6 C6 P1 107.54(9) . . ? 
C7 C6 P1 110.34(9) . . ? 
N6 C6 P2 108.02(9) . . ? 
C7 C6 P2 107.89(10) . . ? 
P1 C6 P2 114.91(7) . . ? 
C6 C7 H7A 109.5 . . ? 
C6 C7 H7B 109.5 . . ? 
H7A C7 H7B 109.5 . . ? 
C6 C7 H7C 109.5 . . ? 
H7A C7 H7C 109.5 . . ? 
H7B C7 H7C 109.5 . . ? 
C2 N1 C5 105.98(15) . . ? 
C2 N1 H1 124.5(16) . . ? 
C5 N1 H1 129.5(16) . . ? 
C2 N3 N4 111.18(16) . . ? 
C2 N3 H3 125.8(19) . . ? 
N4 N3 H3 123.0(19) . . ? 
C5 N4 N3 103.41(15) . . ? 
C6 N6 H6A 109.5 . . ? 
C6 N6 H6B 109.5 . . ? 
H6A N6 H6B 109.5 . . ? 
C6 N6 H6C 109.5 . . ? 
H6A N6 H6C 109.5 . . ? 
H6B N6 H6C 109.5 . . ? 
P1 O3 H6 111.6(19) . . ? 
P2 O5 H7 110.7(18) . . ? 
H1W1 O1W H2W1 108(3) . . ? 
O2 P1 O1 116.67(6) . . ? 
O2 P1 O3 106.95(6) . . ? 
O1 P1 O3 111.45(6) . . ? 
O2 P1 C6 108.82(6) . . ? 
O1 P1 C6 108.16(6) . . ? 
O3 P1 C6 104.04(6) . . ? 
O4 P2 O6 117.29(7) . . ? 
O4 P2 O5 106.64(7) . . ? 
O6 P2 O5 111.95(7) . . ? 
O4 P2 C6 109.48(6) . . ? 
O6 P2 C6 104.66(6) . . ? 
O5 P2 C6 106.32(6) . . ? 
  
loop_ 
 _geom_torsion_atom_site_label_1 
 _geom_torsion_atom_site_label_2 
 _geom_torsion_atom_site_label_3 
 _geom_torsion_atom_site_label_4 
 _geom_torsion 
 _geom_torsion_site_symmetry_1 
 _geom_torsion_site_symmetry_2 
 _geom_torsion_site_symmetry_3 
 _geom_torsion_site_symmetry_4 
 _geom_torsion_publ_flag 
N3 C2 N1 C5 1.0(2) . . . . ? 
N4 C5 N1 C2 -0.8(3) . . . . ? 
N1 C2 N3 N4 -0.8(2) . . . . ? 
N1 C5 N4 N3 0.3(3) . . . . ? 
C2 N3 N4 C5 0.3(2) . . . . ? 
N6 C6 P1 O2 -47.84(10) . . . . ? 
C7 C6 P1 O2 -165.32(10) . . . . ? 
P2 C6 P1 O2 72.45(9) . . . . ? 
N6 C6 P1 O1 -175.49(8) . . . . ? 
C7 C6 P1 O1 67.03(11) . . . . ? 
P2 C6 P1 O1 -55.20(9) . . . . ? 
N6 C6 P1 O3 65.90(10) . . . . ? 
C7 C6 P1 O3 -51.58(11) . . . . ? 
P2 C6 P1 O3 -173.81(7) . . . . ? 
N6 C6 P2 O4 -171.07(8) . . . . ? 
C7 C6 P2 O4 -54.63(11) . . . . ? 
P1 C6 P2 O4 68.91(9) . . . . ? 
N6 C6 P2 O6 -44.54(10) . . . . ? 
C7 C6 P2 O6 71.89(10) . . . . ? 
P1 C6 P2 O6 -164.56(7) . . . . ? 
N6 C6 P2 O5 74.09(10) . . . . ? 
C7 C6 P2 O5 -169.48(9) . . . . ? 
P1 C6 P2 O5 -45.93(9) . . . . ? 
  
loop_ 
 _geom_hbond_atom_site_label_D 
 _geom_hbond_atom_site_label_H 
 _geom_hbond_atom_site_label_A 
 _geom_hbond_distance_DH 
 _geom_hbond_distance_HA 
 _geom_hbond_distance_DA 
 _geom_hbond_angle_DHA 
 _geom_hbond_site_symmetry_A 
N6 H6C O1  0.89 1.98 2.7827(16) 149.8 1_455 
N6 H6B O2  0.89 1.99 2.8530(16) 162.3 2_765 
N6 H6A O4  0.89 1.99 2.8156(17) 153.8 1_455 
O1W H2W1 O4  0.83(3) 1.84(3) 2.6601(19) 166(3) 2_766 
O1W H1W1 N4  0.83(3) 2.13(3) 2.925(2) 160(3) 2_656 
O5 H7 O2  0.75(2) 1.82(2) 2.5690(17) 173(2) 2_765 
O3 H6 O1  0.79(3) 1.80(3) 2.5885(16) 175(3) 2_775 
N3 H3 O1W  0.80(3) 1.85(3) 2.648(2) 178(3) 1_455 
N1 H1 O6  0.95(3) 1.66(3) 2.6081(18) 174(3) . 
  
_diffrn_measured_fraction_theta_max    0.963 
_diffrn_reflns_theta_full              27.99 
_diffrn_measured_fraction_theta_full   0.963 
_refine_diff_density_max    0.391 
_refine_diff_density_min   -0.344 
_refine_diff_density_rms    0.060 
